# Supplementary material for: Surface-enhanced Raman scattering (SERS) and tip-enhanced Raman scattering (TERS) in label-free characterization of erythrocyte membranes and extracellular vesicles at the nano-scale and molecular level
Source: Royal Society of Chemistry journal article supplement (doi:10.1039/d3an01658g), 2023-12-18
Supplement: d3an01658g1.pdf [file d3an01658g1.pdf]

## Supplementary information

### Surface-enhanced (SERS) and tip-enhanced (TERS) Raman scattering in label-free characterization of erythrocyte membranes and extracellular vesicles at the nano-scale and molecular level

T. Stepanenko<sup>a,b,c</sup>, K. Sofińska<sup>d</sup>, N. Wilkosz<sup>c</sup>, J. Dybas<sup>e</sup>, E. Wiercigroch<sup>f</sup>, K. Bulat<sup>c</sup>, E. Szczesny-Malysiak<sup>e</sup>, Katarzyna Skirlińska-Nosek<sup>a,d</sup>, Sara Seweryn<sup>a,d</sup>, J. Chwiej<sup>c</sup>, E. Lipiec<sup>d\*</sup>, K.M. Marzec<sup>c,g\*</sup>

<sup>a</sup>Jagiellonian University, Doctoral School of Exact and Natural Sciences, Krakow, Łojasiewicza 11

<sup>b</sup>Jagiellonian University, National Synchrotron Radiation Centre SOLARIS, Czerwone Maki 98 Str., 30-392 Krakow, Poland

<sup>c</sup>AGH University of Krakow, Faculty of Physics and Applied Computer Science, Al. Mickiewicza 30, 30-059 Krakow, Poland

<sup>d</sup>Jagiellonian University, M. Smoluchowski Institute of Physics, Łojasiewicza 11, 30-348 Kraków, Poland

<sup>e</sup>Jagiellonian University, Jagiellonian Center for Experimental Therapeutics, 14 Bobrzyńskiego Str., 30-348 Krakow, Poland

<sup>f</sup>Jagiellonian Centre of Innovation, Bobrzynskiego 14 Str., 30-348 Krakow, Poland

<sup>g</sup>Łukasiewicz Research Network – Krakow Institute of Technology, 73 Zakopiańska Str. 30-418 Krakow, Poland

\* Corresponding authors

e-mail: [kmazec@agh.edu.pl](mailto:kmazec@agh.edu.pl)/[katarzyna.marzec@kit.lukasiewicz.gov.pl](mailto:katarzyna.marzec@kit.lukasiewicz.gov.pl), [ewelina.lipiec@uj.edu.pl](mailto:ewelina.lipiec@uj.edu.pl)

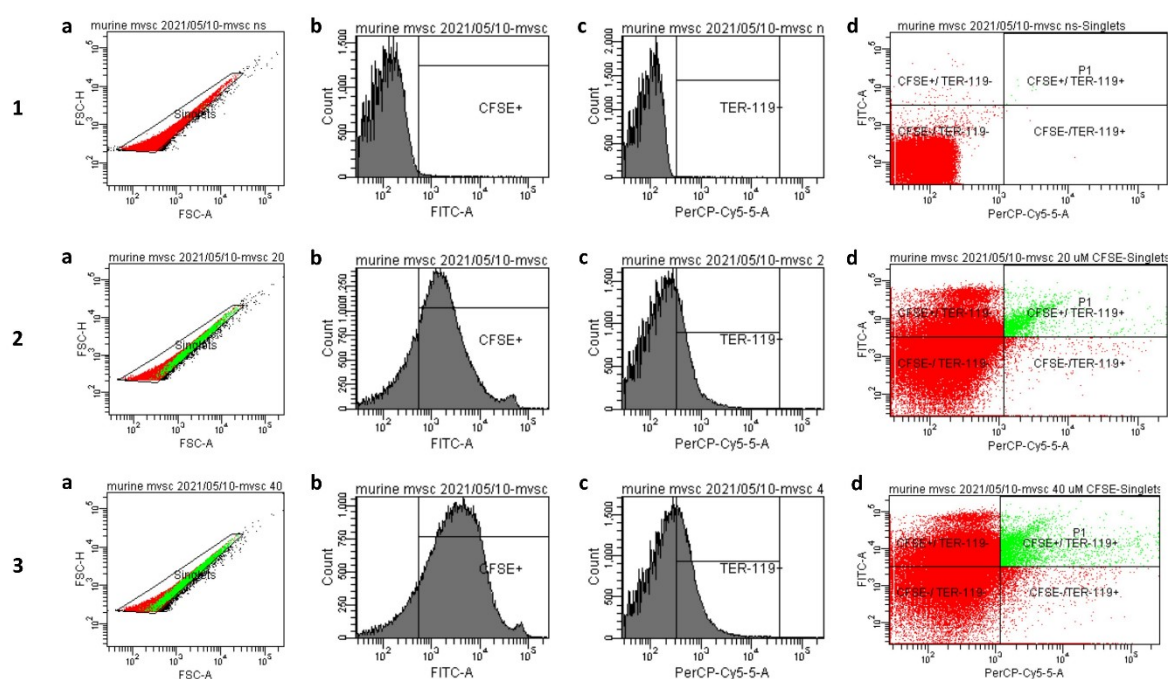

Fig. SI1. Assessment of red blood cell-derived extracellular microvesicles (REVs) with use of flow cytometry. Samples were unstained (Control) (1) or stained with either 20 (2) or 40  $\mu$ M (3) CFSE Cell Trace Proliferation Kit and 1:100 anti-TER-119 antibody. 150,000,000 events were acquired in log mode for height forward side scatter (FSC-H), area forward scatter (FSC-A) and fluorescent signals. Singlets were gated according to FSC-H to FSC-A ratio (1-3a). Simultaneous presence (d) of CFSE (b) and anti-TER-119 (c) signal indicated the presence of REVs.

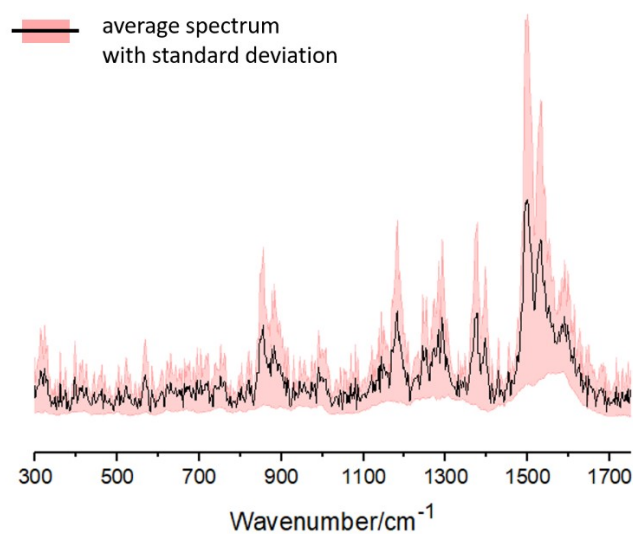

Fig. S12. Averaged spectrum of 20 SERS spectra of the isolated erythrocyte membranes measured with 633 nm laser with AuNp.

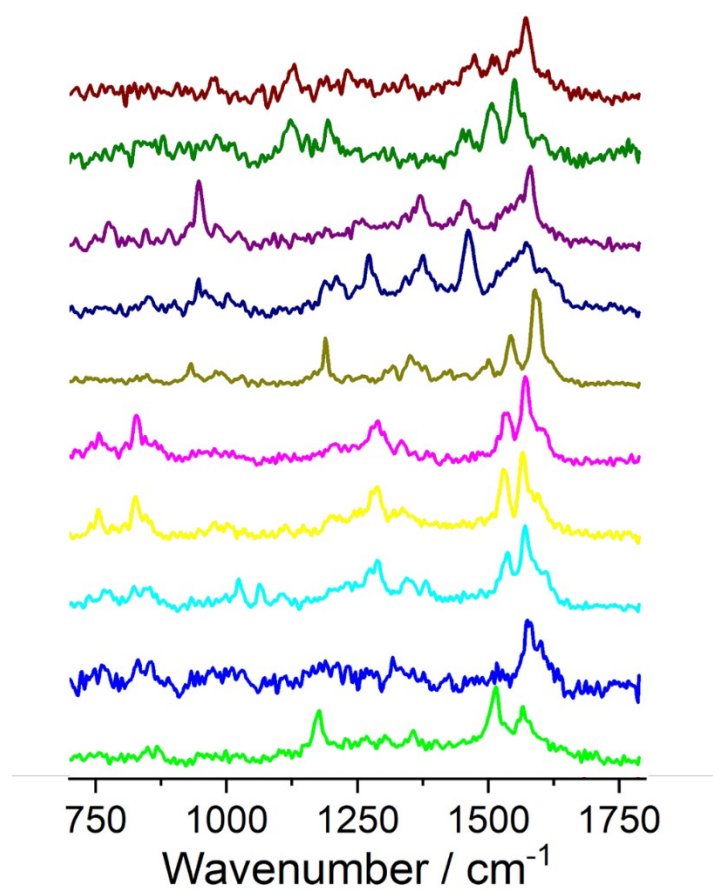

Fig. S13. The single point TERS spectra.

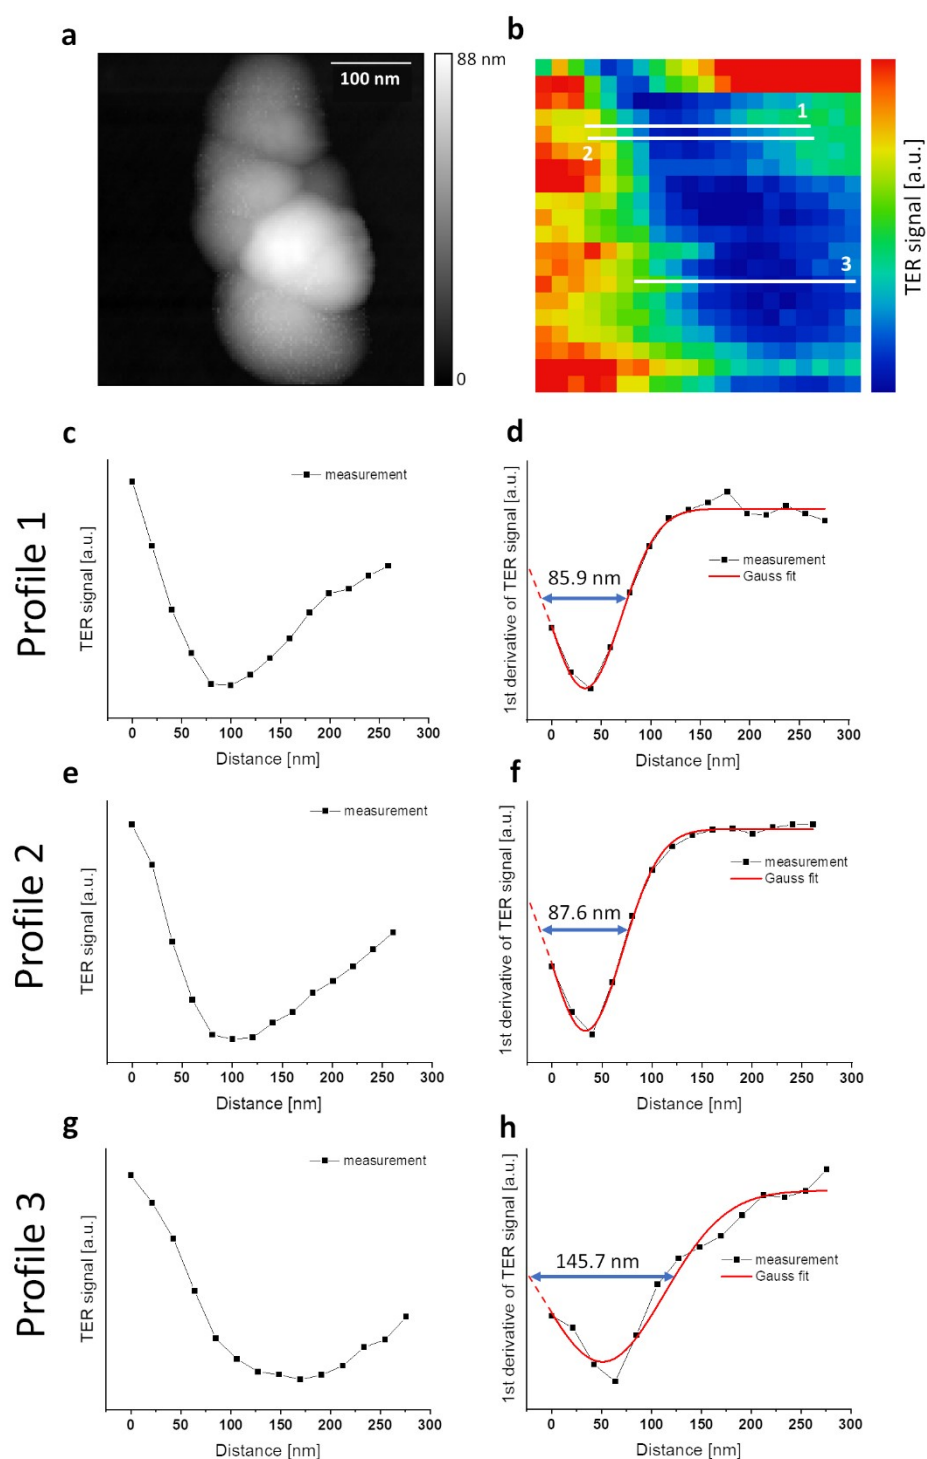

Fig. SI4. The spatial resolution of TERS mapping. AFM image of microvesicles (a) with corresponding TERS map integrated in the spectral range from 984 to 1018  $\text{cm}^{-1}$  attributed to ring breathing vibrations of aromatic acids residues (b). Three intensity profiles were extracted along x axis of the TERS map (c, e, g), and their second derivatives were calculated (d, f, h). The FWHM of Gauss function fitted to the derivative of TERS signal is an equivalent of the spatial resolution. The exact spots of profile extraction are marked on TERS map (b).

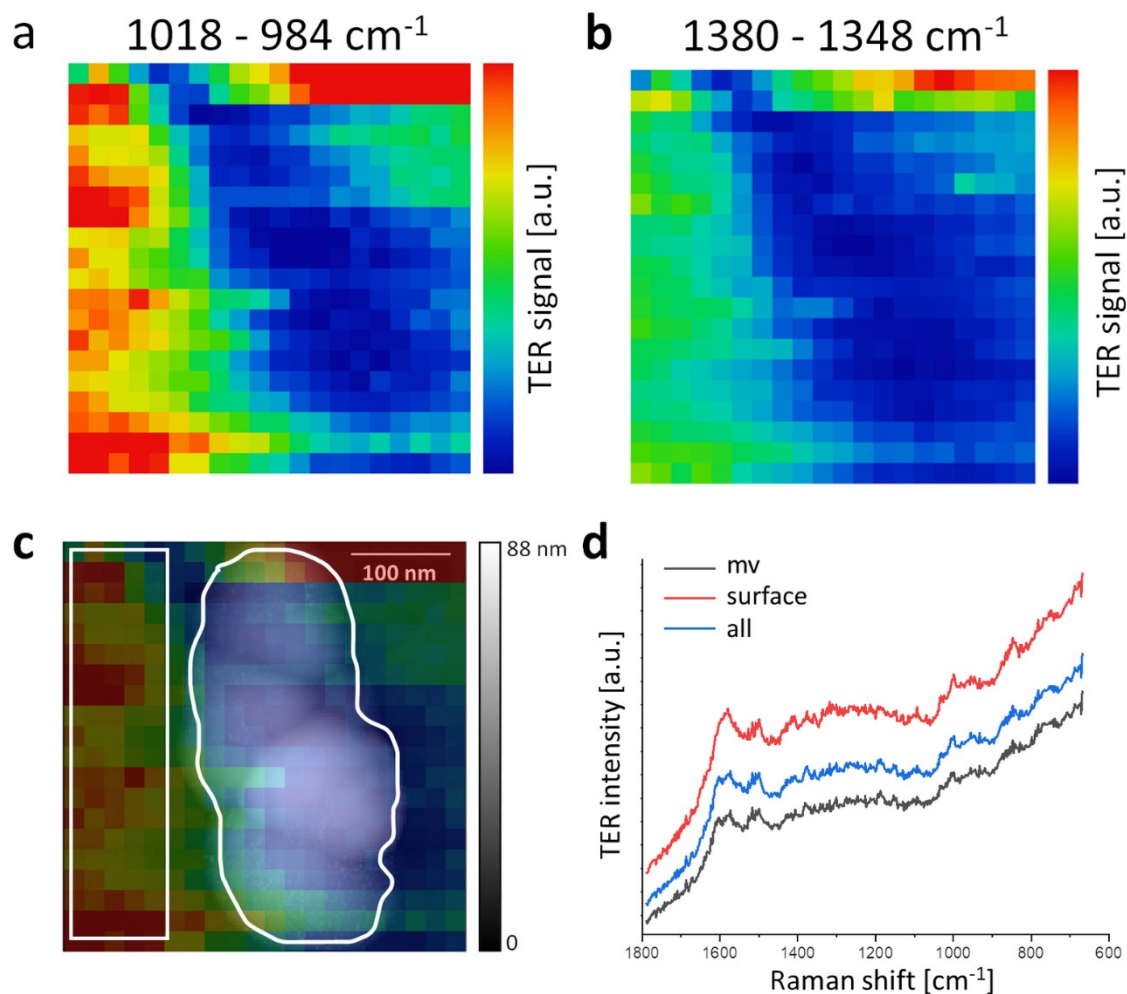

Fig. S15. TERS maps of microvesicles presented in Fig. S14 integrated in the spectral region of 1018-984  $\text{cm}^{-1}$  (ring breathing vibrations of aromatic acids residues) (a), and 1380-1348  $\text{cm}^{-1}$  (the amide III). Map (a) superimposed in AFM topography image (c) with corresponding averaged TERS spectra from MV (black), surrounding surface (red), and the whole map (d). The contours on the (c) insert represent the spatial locations from which the spectra were averaged.
